# Supplementary material
Source: Springer Nature journal article supplement (https://www.springermedizin.de/resource/supplementary/12889_2012_5521_MOESM10_ESM.pdf/9494540)

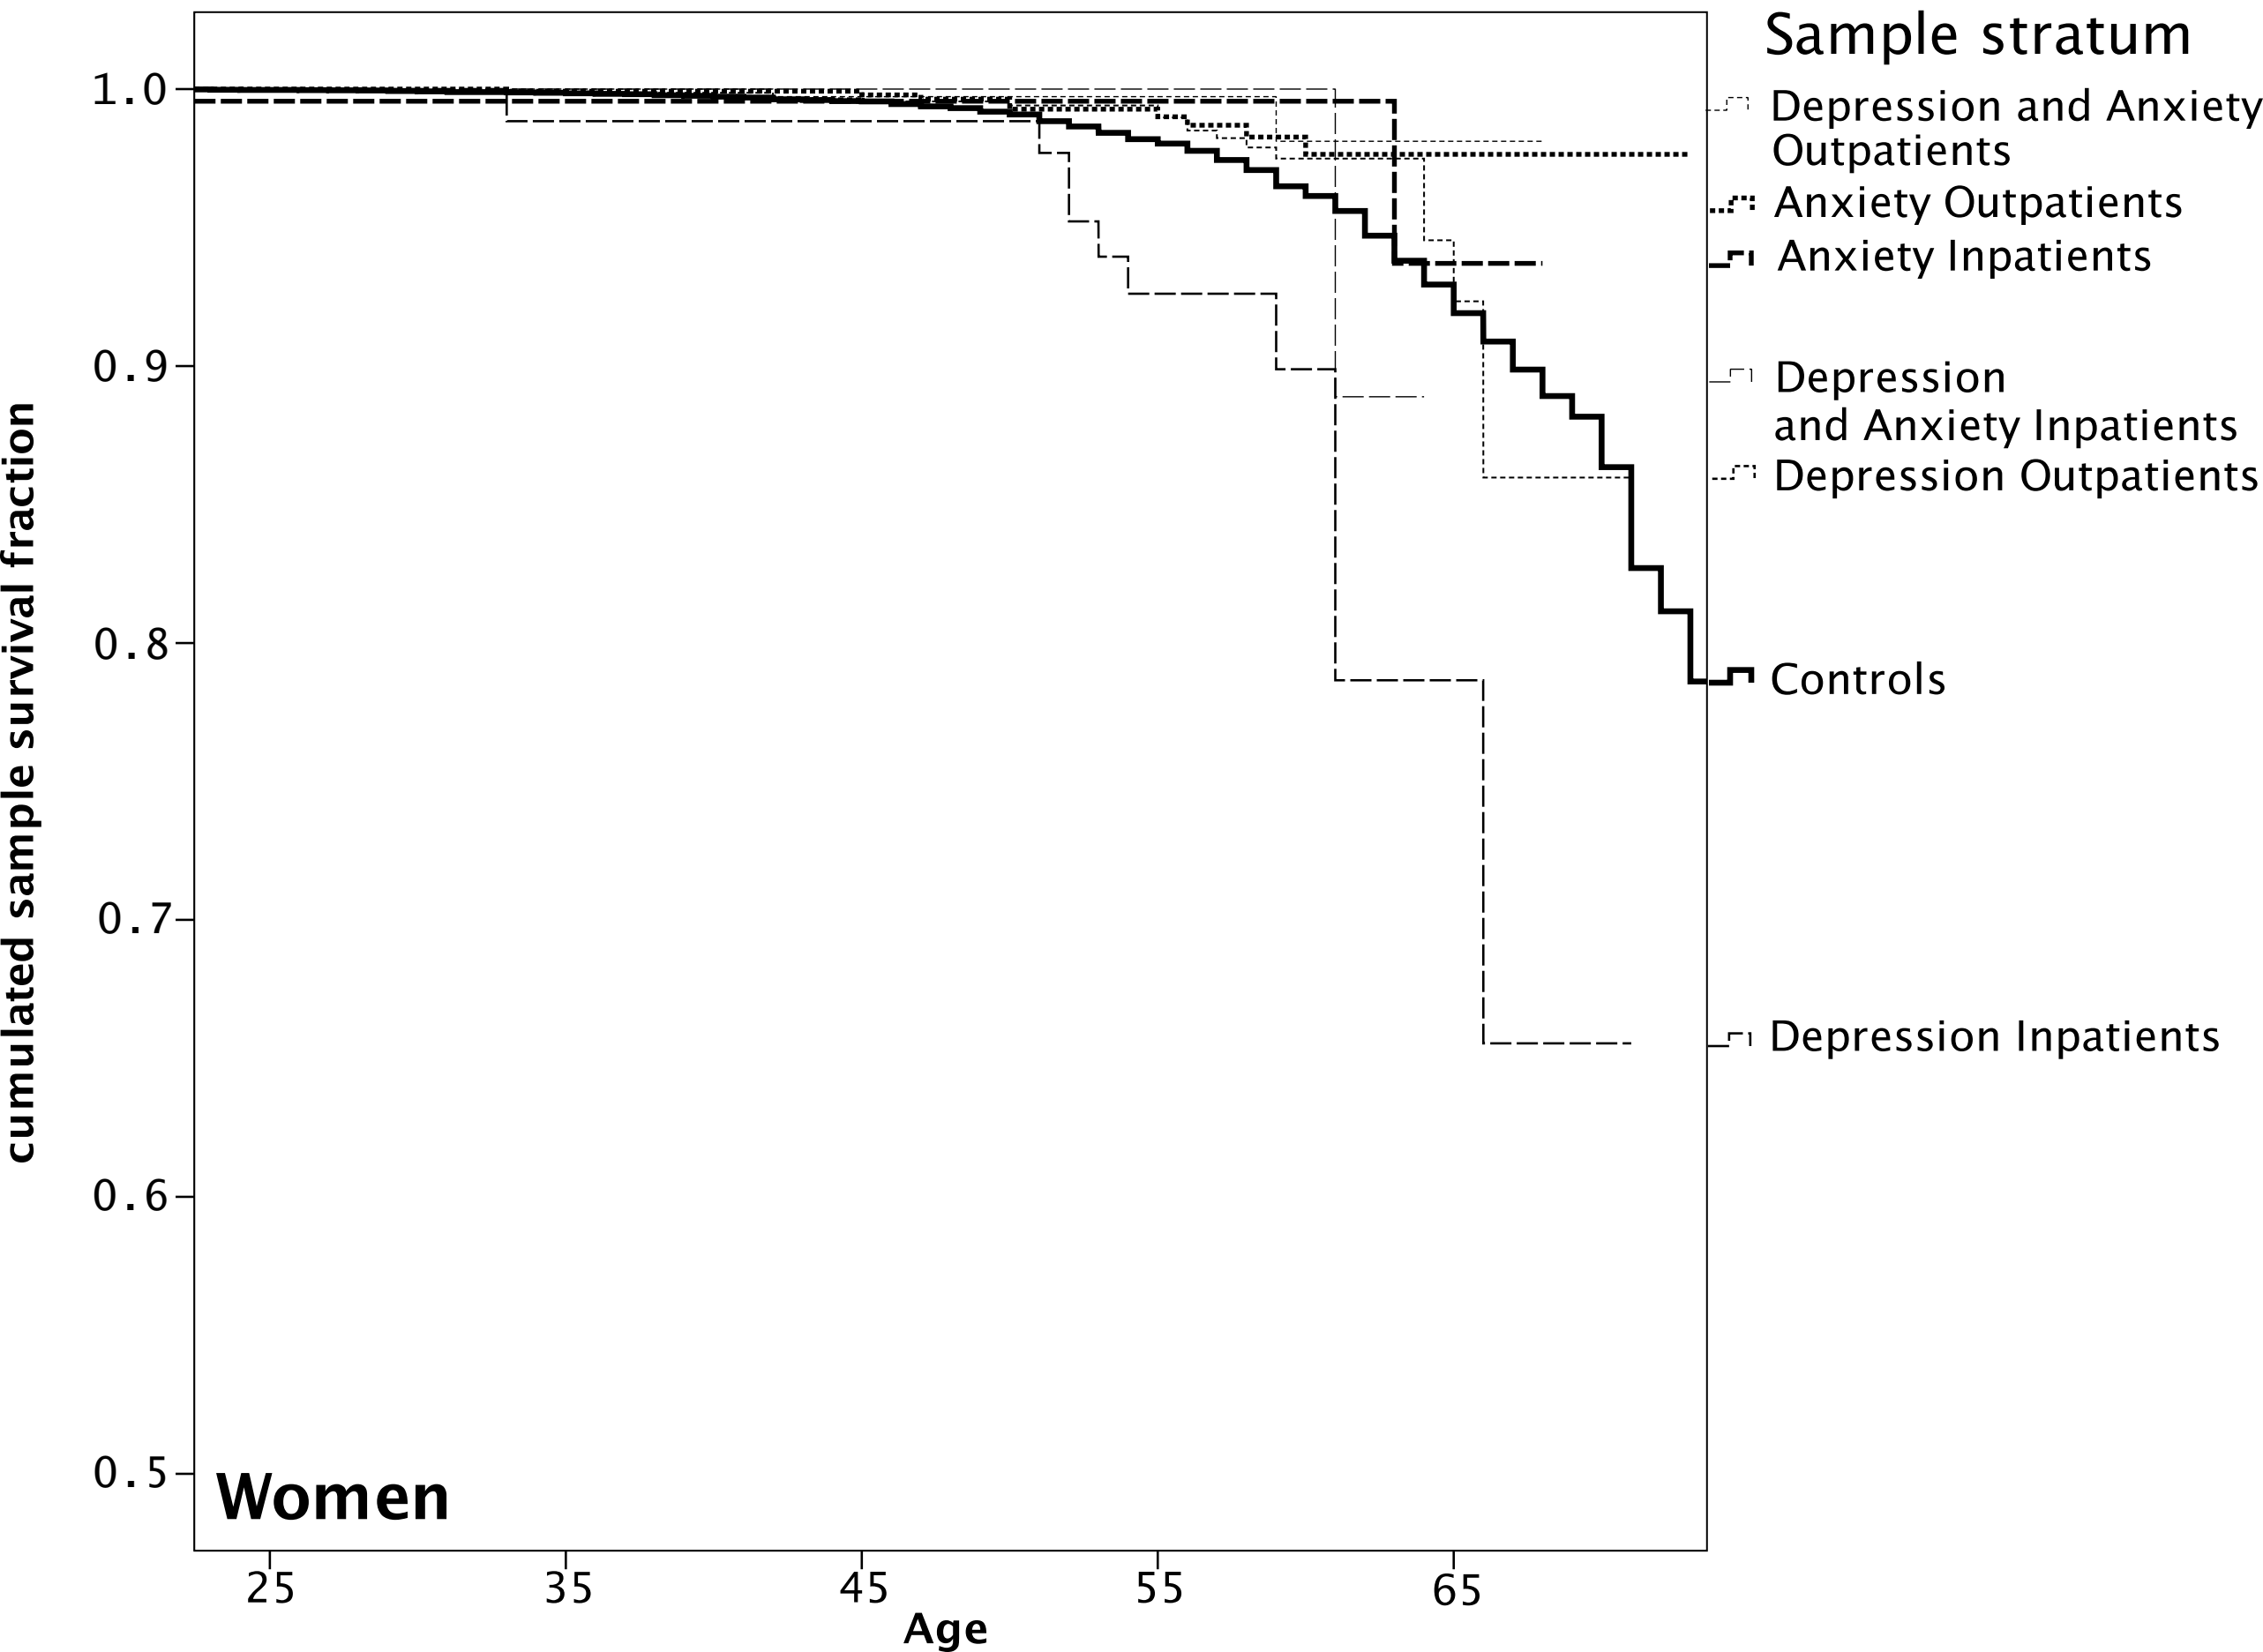

Supplement: MOESM10 [file 9494540]
